# Supplementary material for: Briarane-Related Diterpenoids from Octocoral Briareum stechei
Source: Molecules. 2021 Nov 13;26(22):6861. doi: 10.3390/molecules26226861 (PMC8619598; doi:10.3390/molecules26226861)
Supplement: Supplementary file 1 [file molecules-26-06861-s001.zip › molecules-1439637-supplementary.pdf]

## Supplementary materials

|                                                                                                                      |    |
|----------------------------------------------------------------------------------------------------------------------|----|
| Figure S1. ESIMS spectrum of compound <b>2</b> .....                                                                 | 2  |
| Figure S2. HRESIMS spectrum of compound <b>2</b> .....                                                               | 3  |
| Figure S3. IR spectrum of compound <b>2</b> .....                                                                    | 3  |
| Figure S4. <sup>1</sup> H NMR spectrum (400 MHz) of compound <b>2</b> in acetone- <i>d</i> <sub>6</sub> .....        | 4  |
| Figure S5. <sup>13</sup> C NMR spectrum (100 MHz) of compound <b>2</b> in acetone- <i>d</i> <sub>6</sub> .....       | 4  |
| Figure S6. HSQC spectrum of compound <b>2</b> in acetone- <i>d</i> <sub>6</sub> .....                                | 5  |
| Figure S7. HMBC spectrum of compound <b>2</b> in acetone- <i>d</i> <sub>6</sub> .....                                | 5  |
| Figure S8. <sup>1</sup> H– <sup>1</sup> H COSY spectrum of compound <b>2</b> in acetone- <i>d</i> <sub>6</sub> ..... | 6  |
| Figure S9. NOESY spectrum of compound <b>2</b> in acetone- <i>d</i> <sub>6</sub> .....                               | 6  |
| Figure S10. ESIMS spectrum of compound <b>3</b> .....                                                                | 7  |
| Figure S11. HRESIMS spectrum of compound <b>3</b> .....                                                              | 8  |
| Figure S12. IR spectrum of compound <b>3</b> .....                                                                   | 8  |
| Figure S13. <sup>1</sup> H NMR spectrum (400 MHz) of compound <b>3</b> in CDCl <sub>3</sub> .....                    | 9  |
| Figure S14. <sup>13</sup> C NMR spectrum (100 MHz) of compound <b>3</b> in CDCl <sub>3</sub> .....                   | 9  |
| Figure S15. HSQC spectrum of compound <b>3</b> in CDCl <sub>3</sub> .....                                            | 10 |
| Figure S16. HMBC spectrum of compound <b>3</b> in CDCl <sub>3</sub> .....                                            | 10 |
| Figure S17. <sup>1</sup> H– <sup>1</sup> H COSY spectrum of compound <b>3</b> in CDCl <sub>3</sub> .....             | 11 |
| Figure S18. NOESY spectrum of compound <b>3</b> in CDCl <sub>3</sub> .....                                           | 11 |

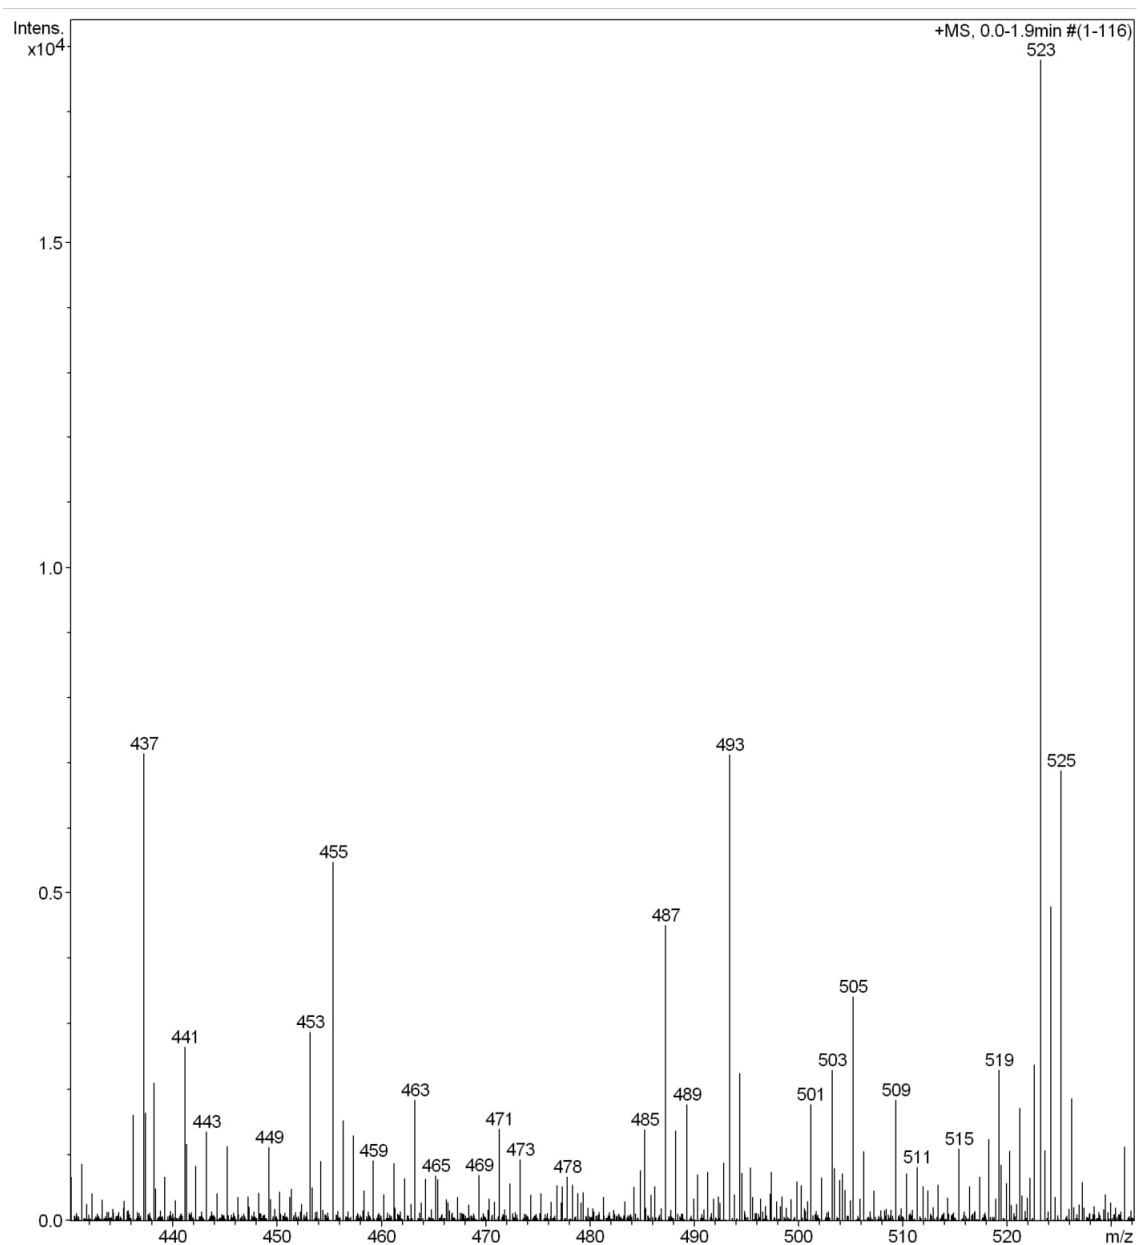

Figure S1. ESIMS spectrum of compound **2**

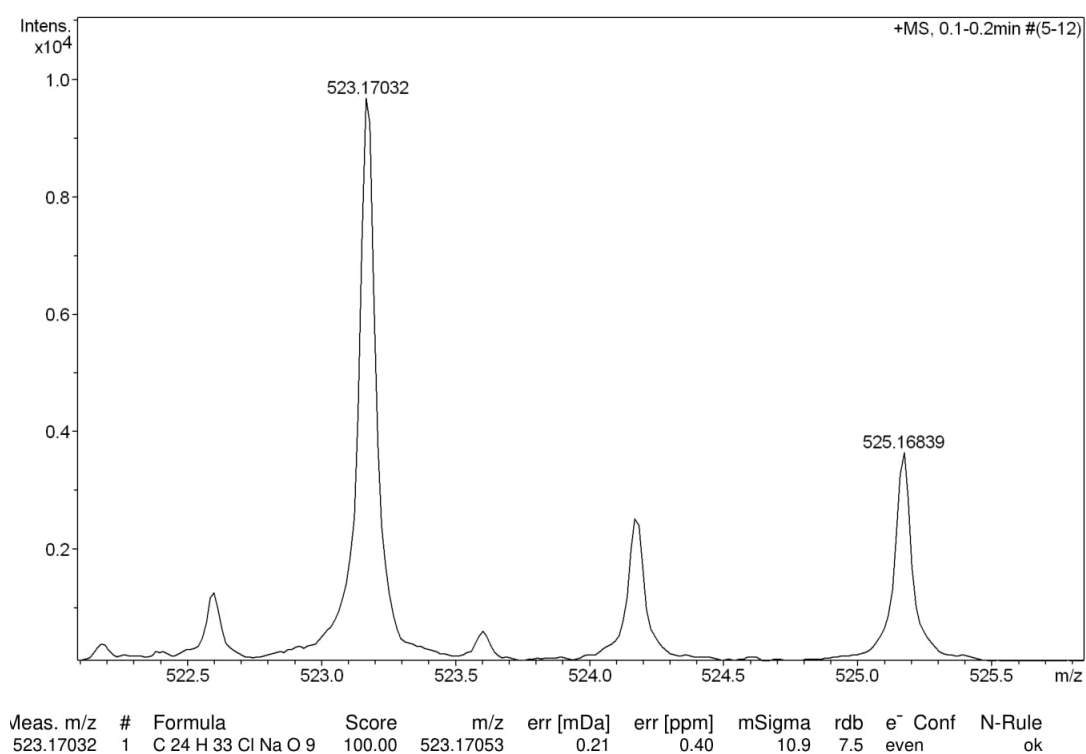

Figure S2. HRESIMS spectrum of compound **2**

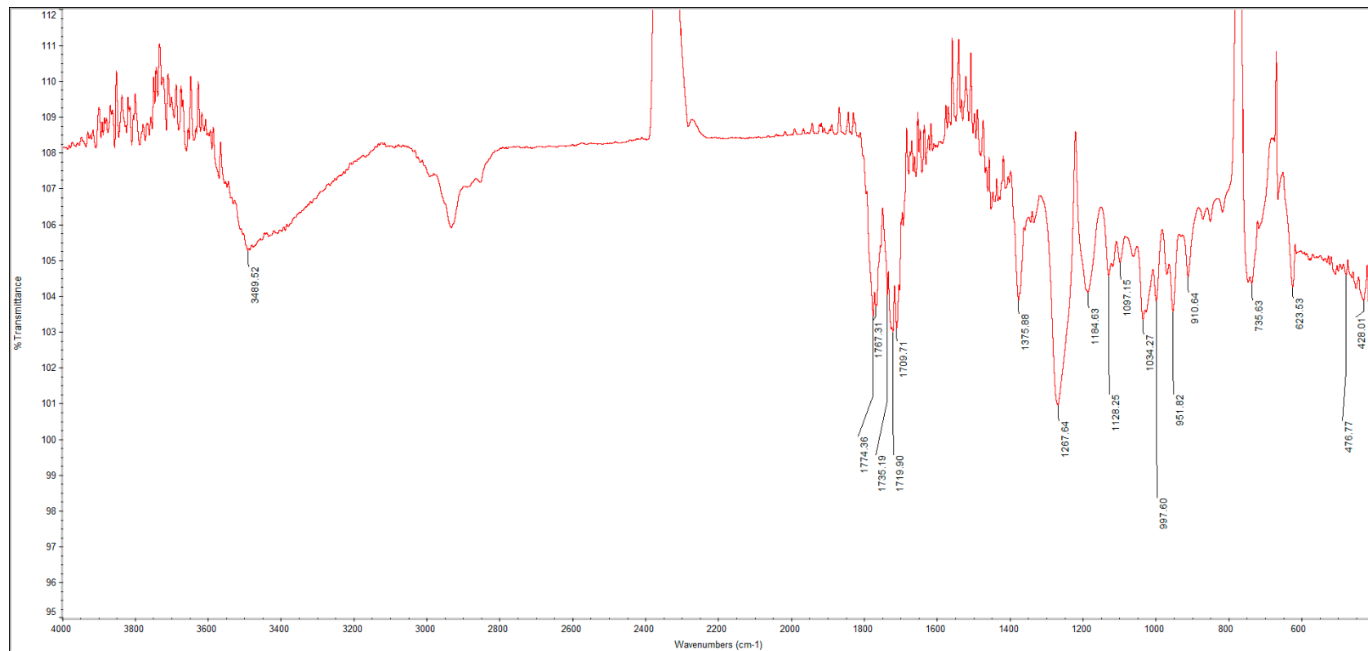

Figure S3. IR spectrum of compound **2**

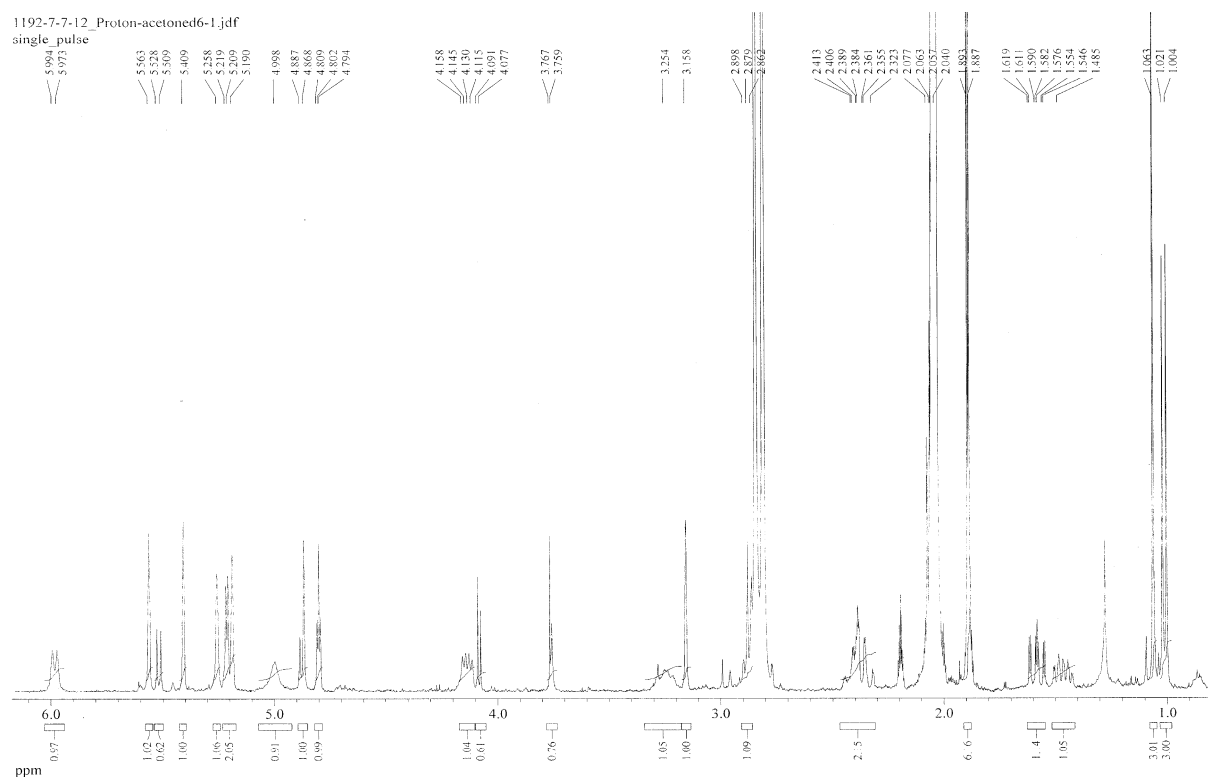

Figure S4.  $^1\text{H}$  NMR spectrum (400 MHz) of compound **2** in acetone- $d_6$

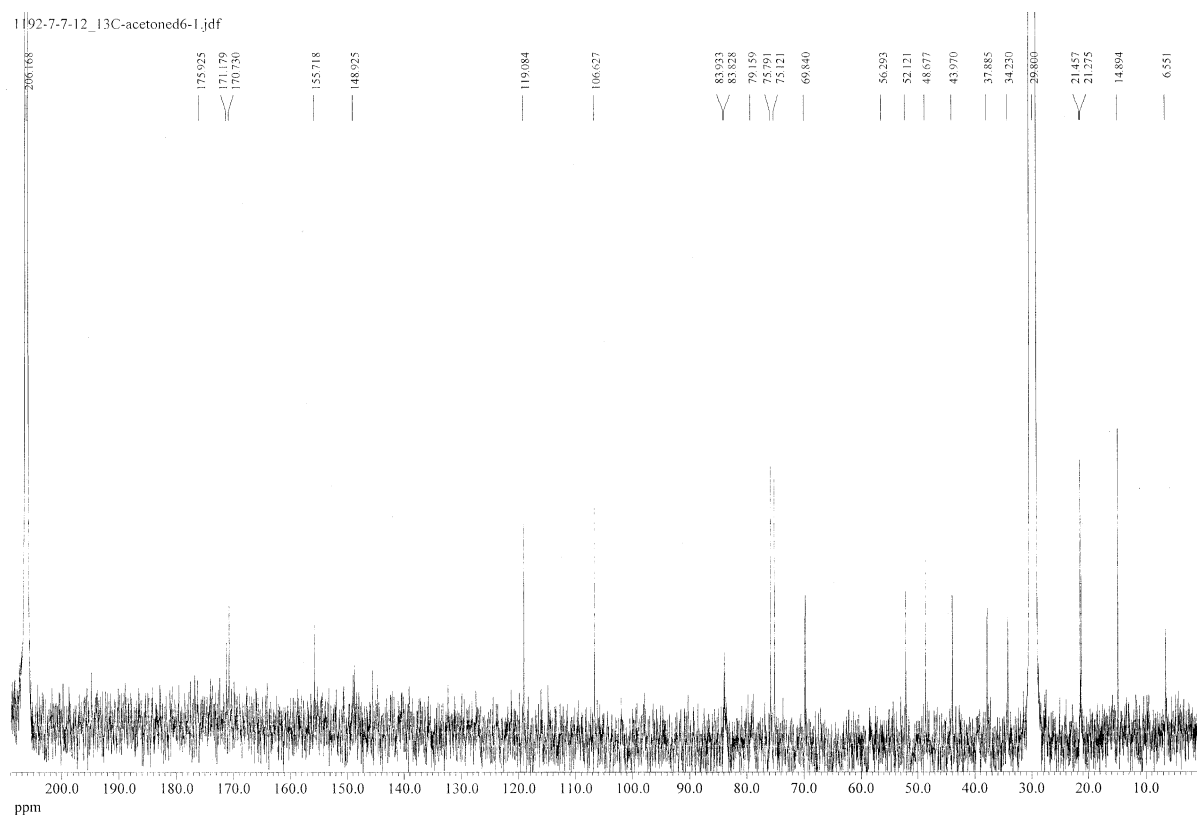

Figure S5.  $^{13}\text{C}$  NMR spectrum (100 MHz) of compound **2** in acetone- $d_6$

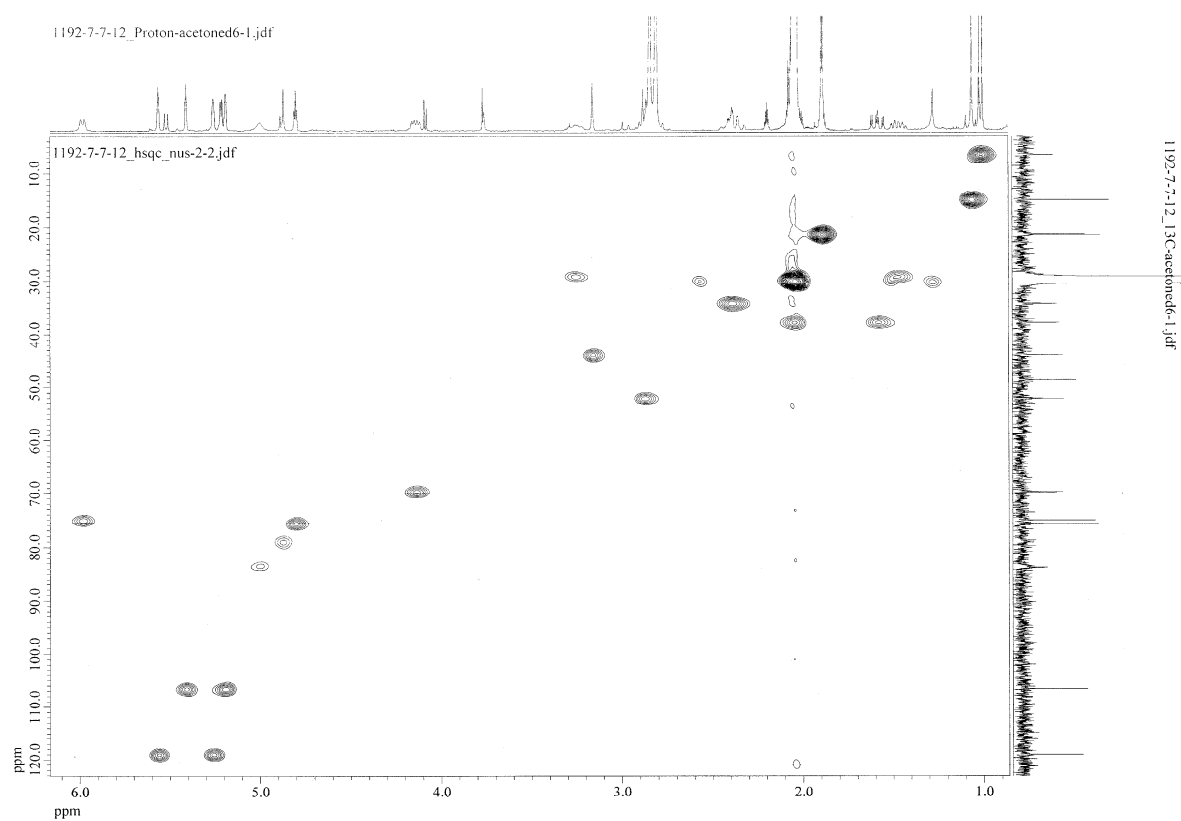

Figure S6. HSQC spectrum of compound **2** in acetone- $d_6$

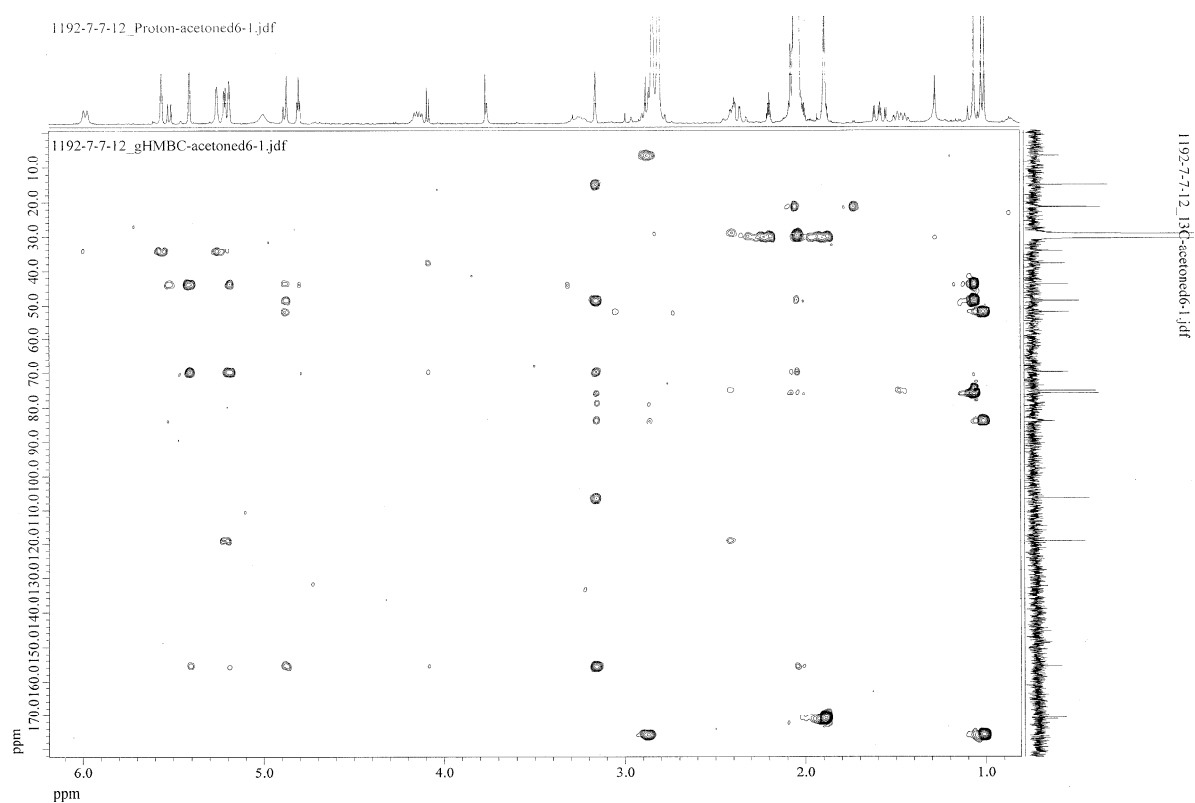

Figure S7. HMBC spectrum of compound **2** in acetone- $d_6$

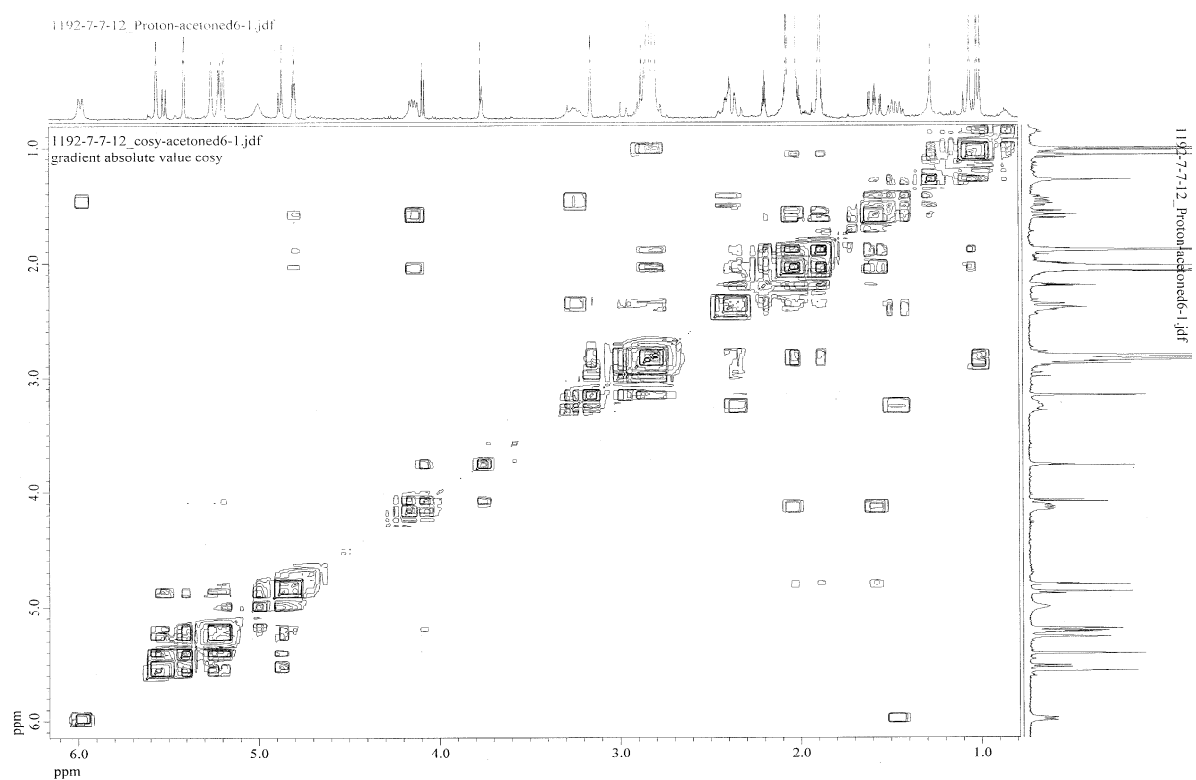

Figure S8.  $^1\text{H}$ – $^1\text{H}$  COSY spectrum of compound **2** in acetone- $d_6$

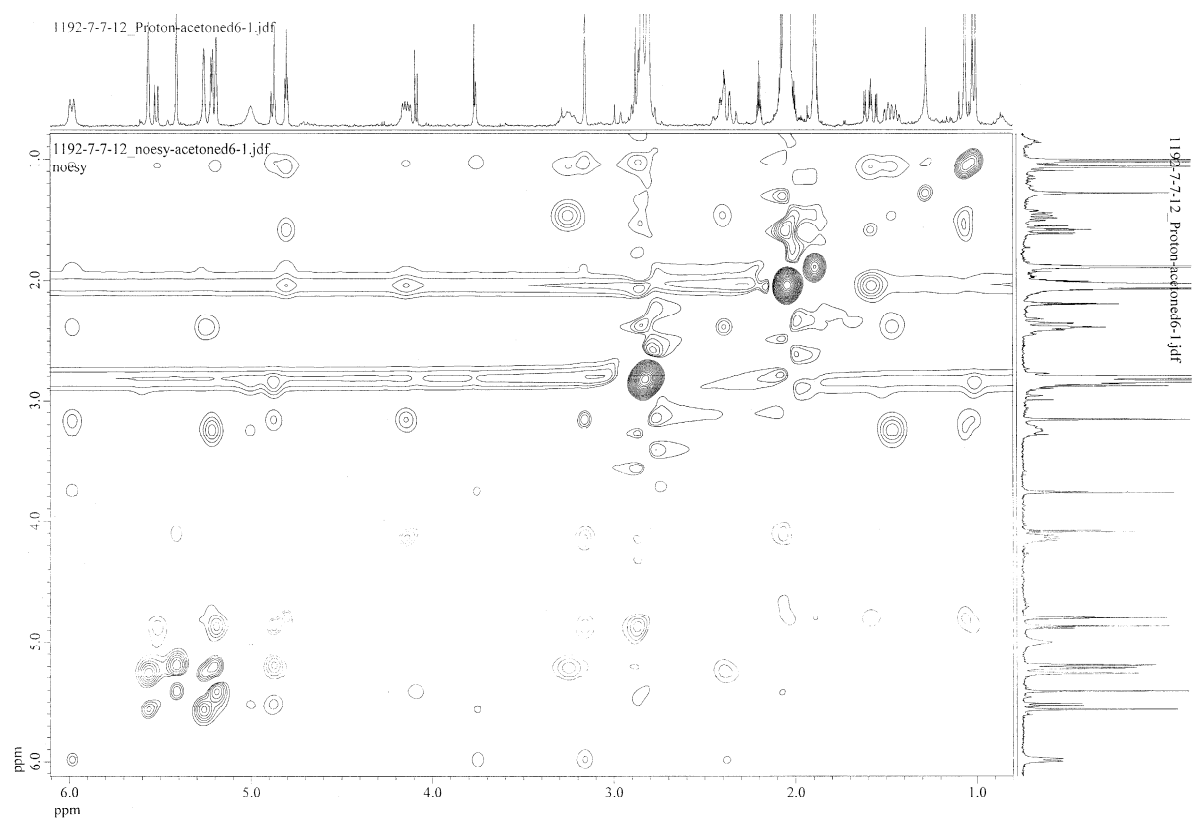

Figure S9. NOESY spectrum of compound **2** in acetone- $d_6$

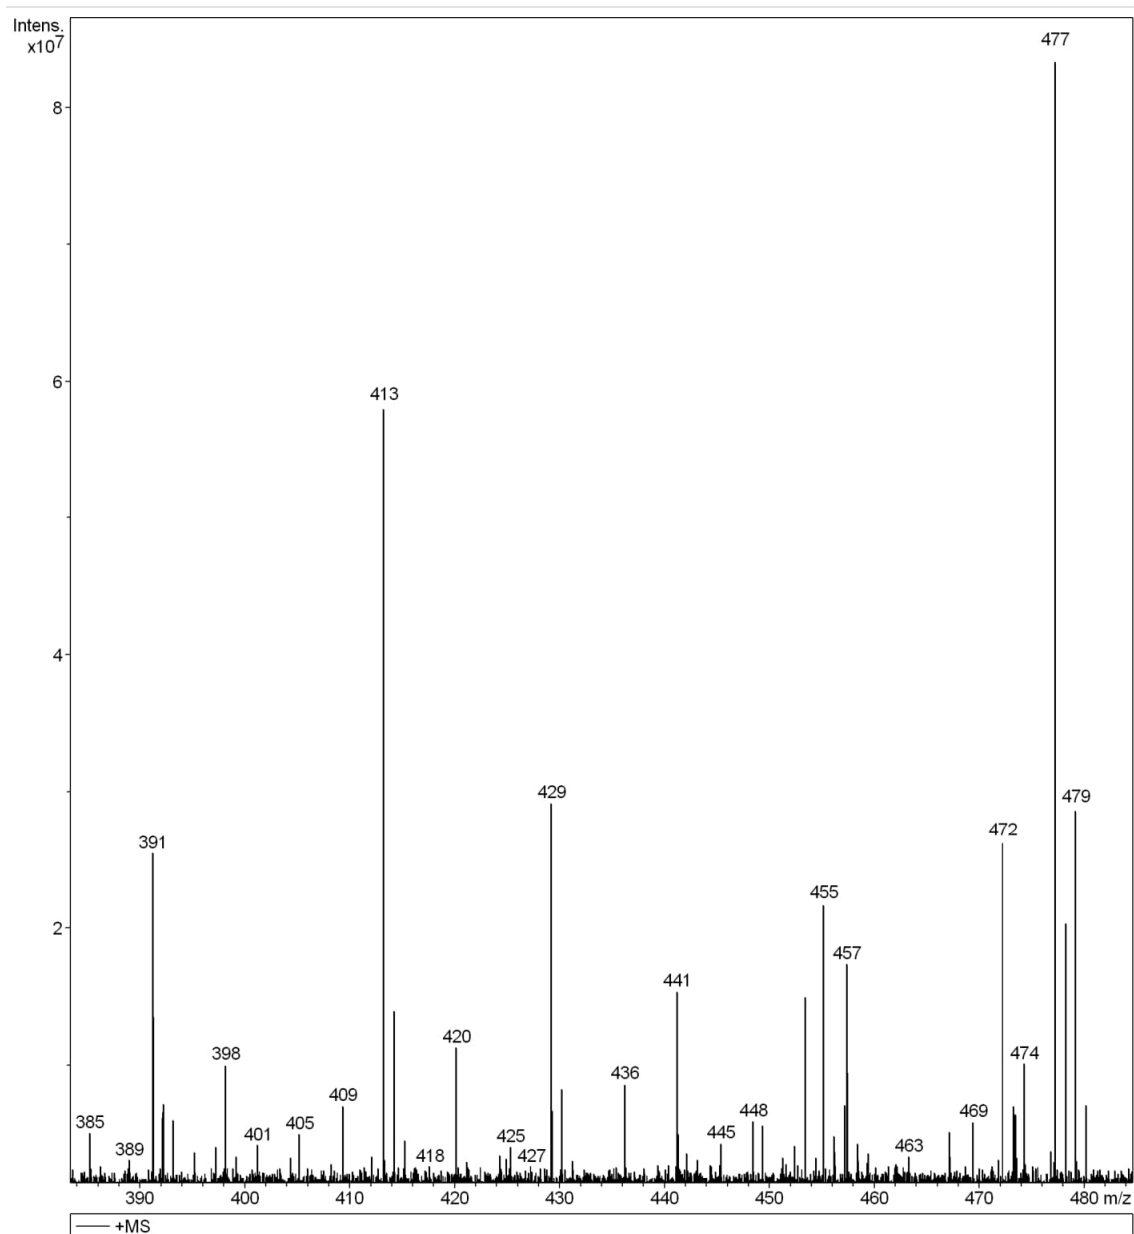

Figure S10. ESIMS spectrum of compound **3**

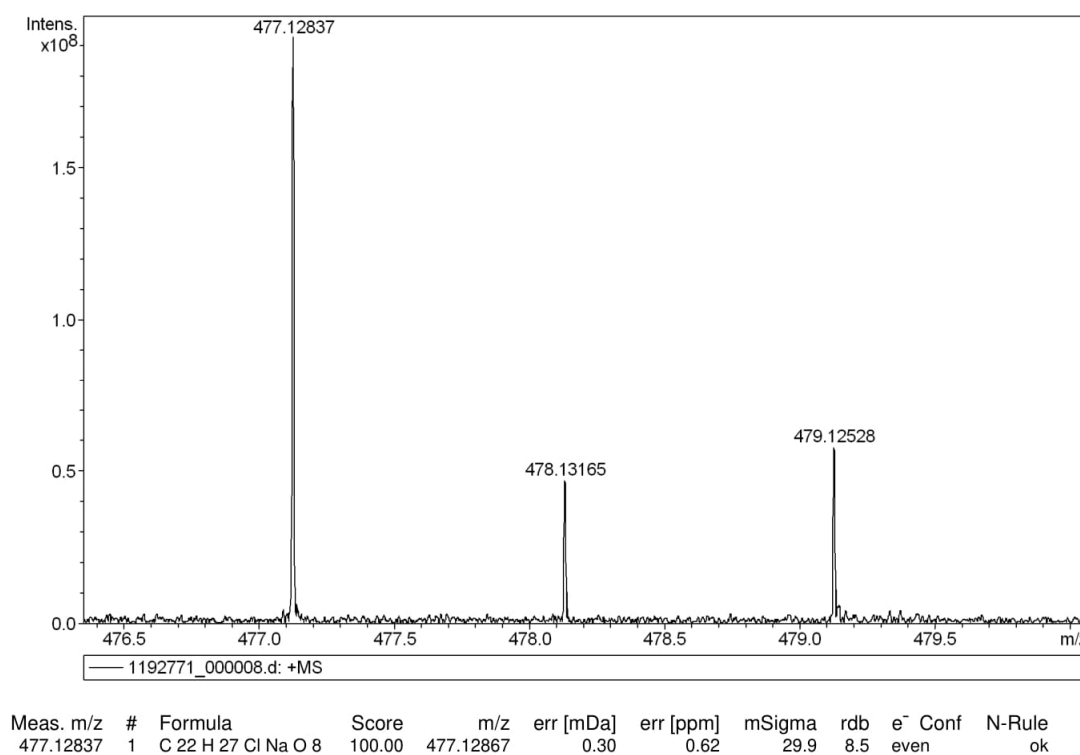

Figure S11. HRESIMS spectrum of compound **3**

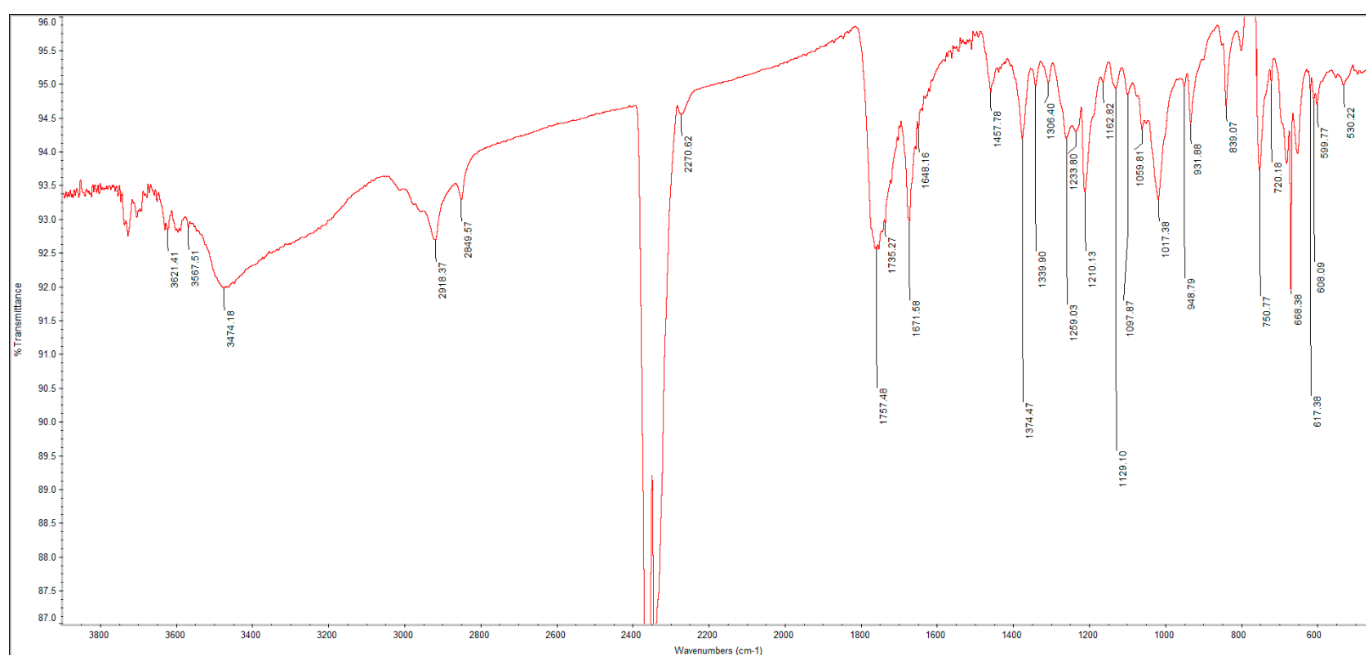

Figure S12. IR spectrum of compound **3**

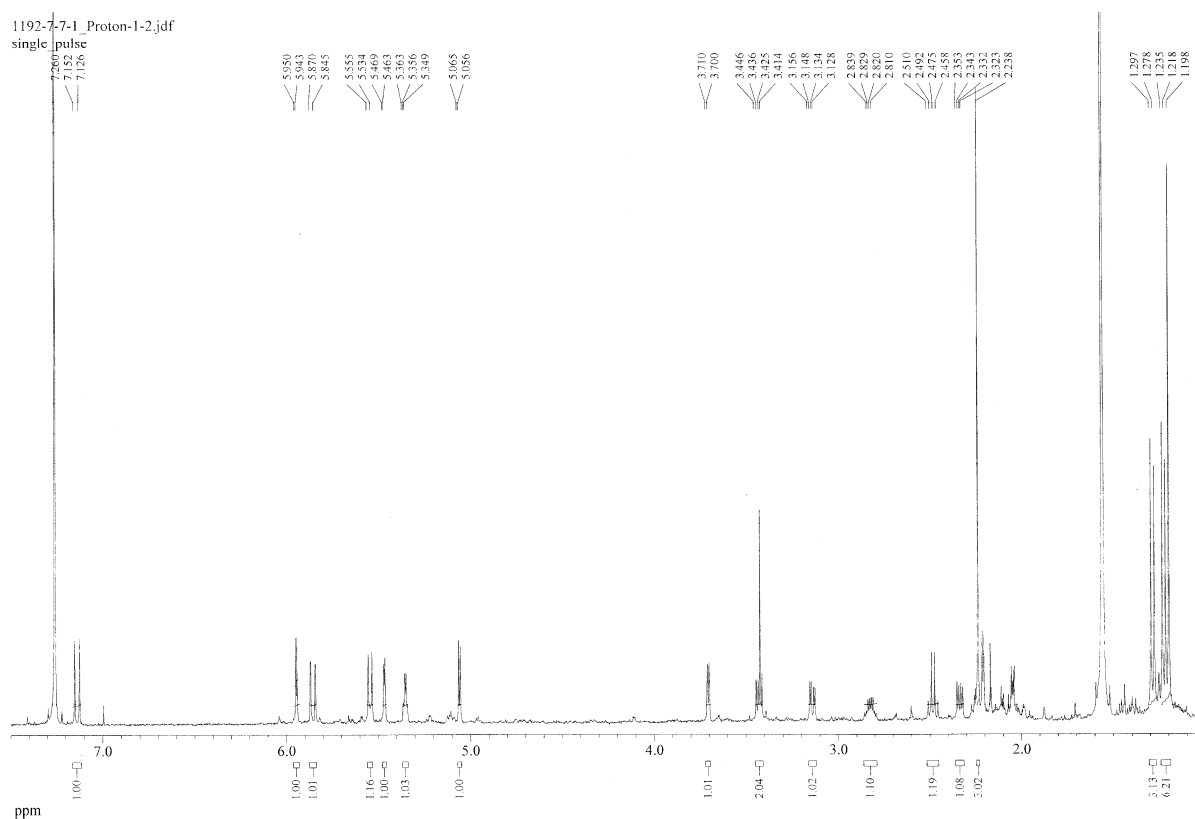

Figure S13.  $^1\text{H}$  NMR spectrum (400 MHz) of compound **3** in  $\text{CDCl}_3$

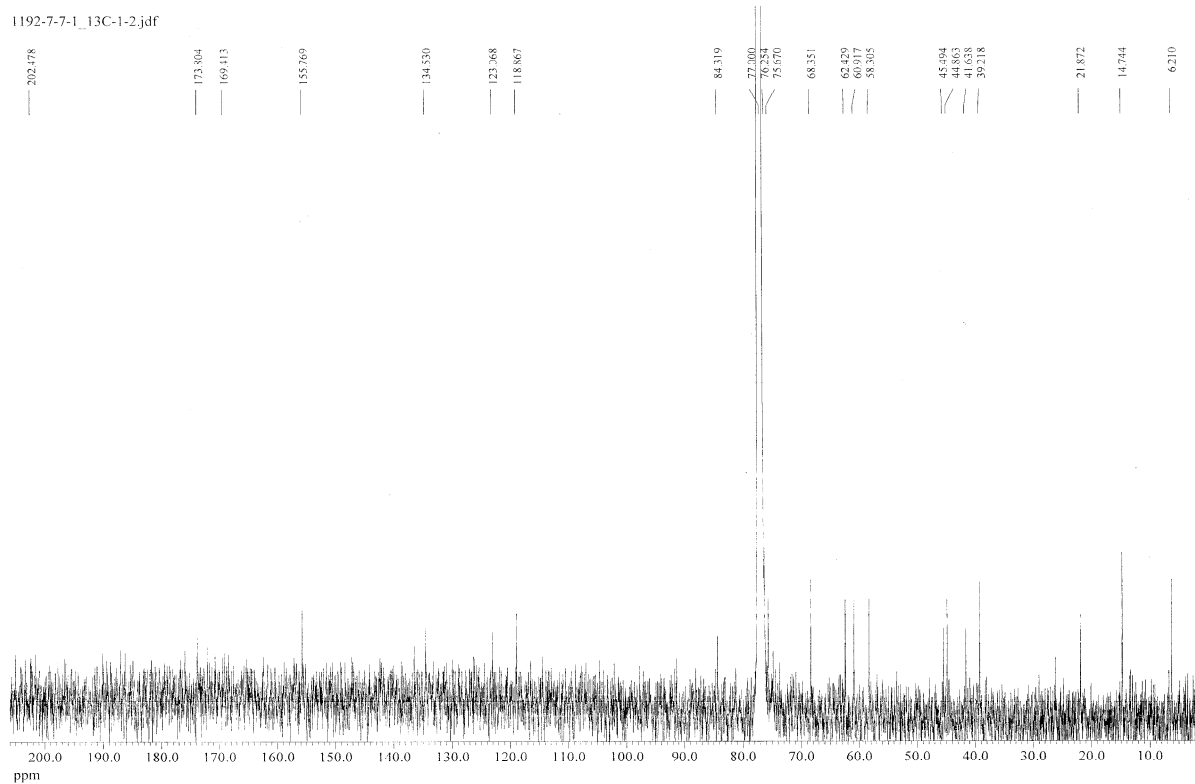

Figure S14.  $^{13}\text{C}$  NMR spectrum (100 MHz) of compound **3** in  $\text{CDCl}_3$

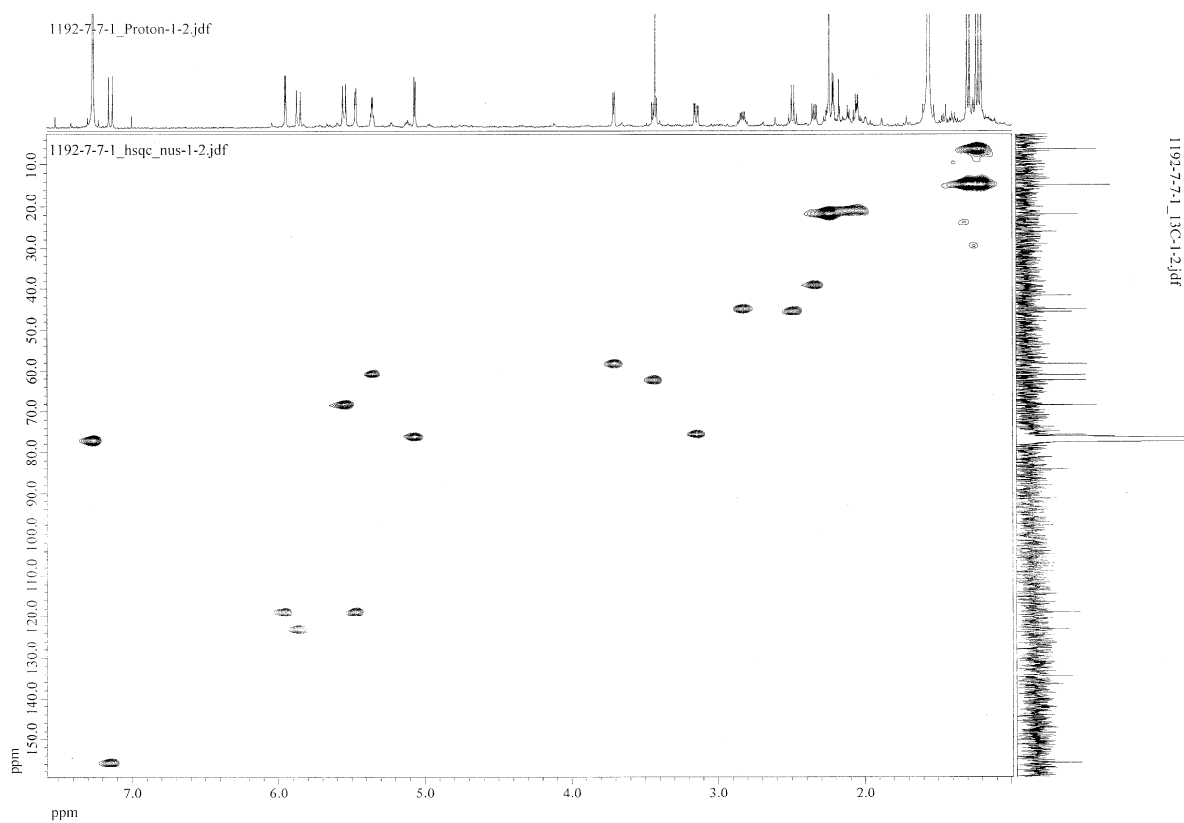

Figure S15. HSQC spectrum of compound **3** in  $\text{CDCl}_3$

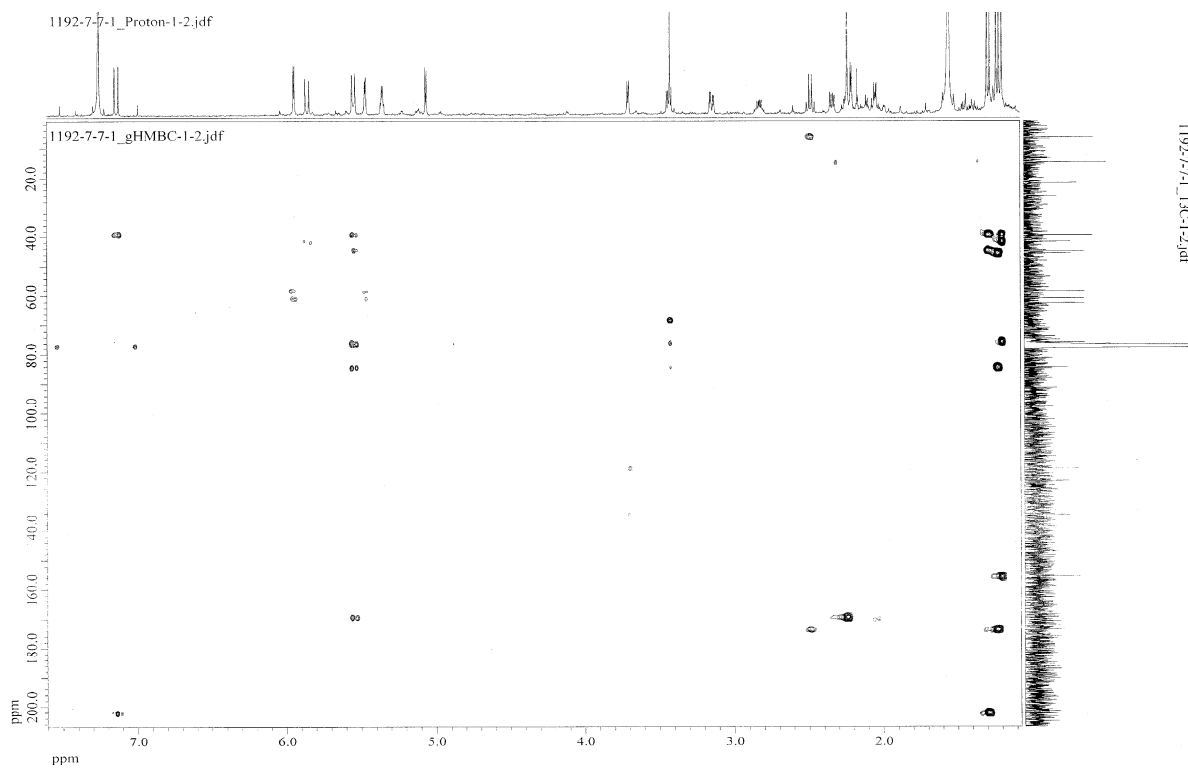

Figure S16. HMBC spectrum of compound **3** in  $\text{CDCl}_3$

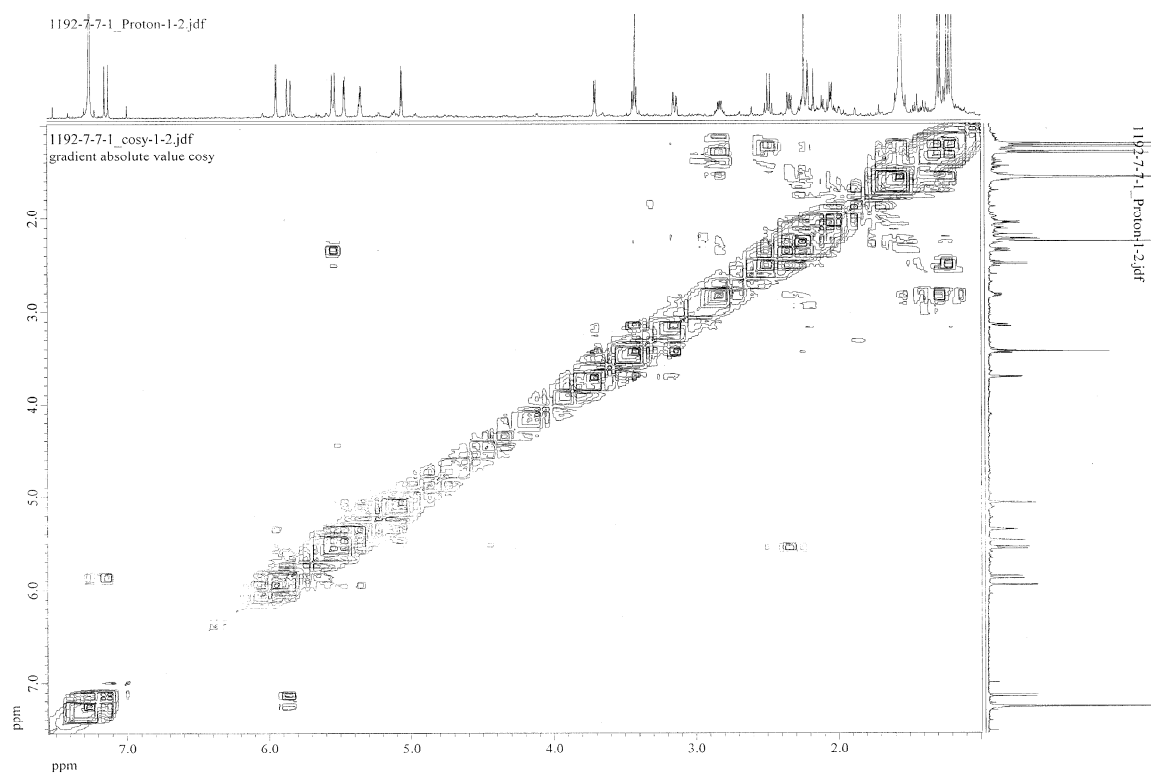

Figure S17.  $^1\text{H}$ - $^1\text{H}$  COSY spectrum of compound **3** in  $\text{CDCl}_3$

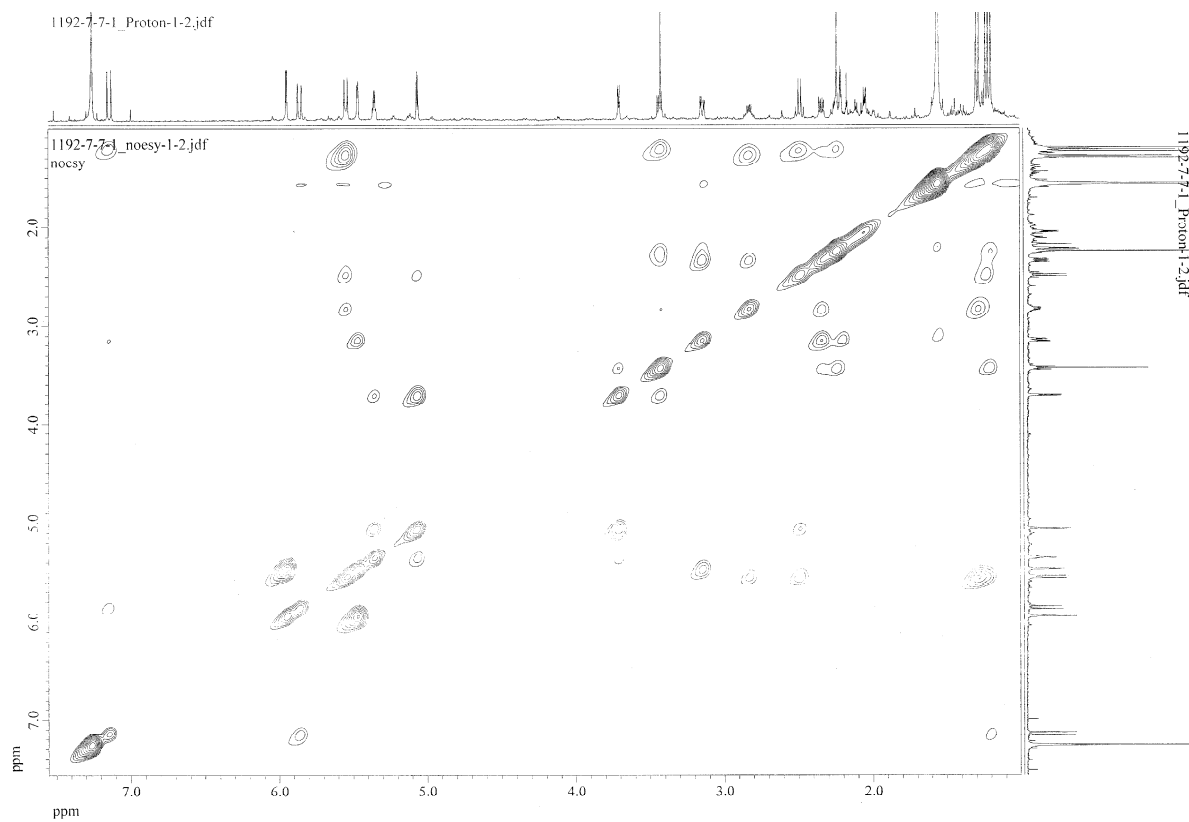

Figure S18. NOESY spectrum of compound **3** in  $\text{CDCl}_3$
